# Supplementary material
Source: PubMed Central journal article supplement (PMC4763366)
Supplement: aasm.39.3.581s1.pdf [file aasm.39.3.581s1.pdf]

**Table S1. Class I allele frequencies in cases and controls for the 45 tested alleles.**

| <b>Allele</b> | <b>frq-control</b> | <b>frq-case</b> | <b>CountryHet</b> |
|---------------|--------------------|-----------------|-------------------|
| A*01:01       | 0.14               | 0.11            | 0                 |
| A*02:01       | 0.28               | 0.28            | 1                 |
| A*03:01       | 0.22               | 0.20            | 0                 |
| A*11:01       | 0.05               | 0.07            | 0                 |
| A*24:02       | 0.10               | 0.10            | 1                 |
| A*25:01       | 0.03               | 0.04            | 1                 |
| A*26:01       | 0.02               | 0.02            | 0                 |
| A*29:02       | 0.02               | 0.02            | 1                 |
| A*30:02       | 0.01               | 0.01            | 0                 |
| A*31:01       | 0.03               | 0.02            | 0                 |
| A*32:01       | 0.03               | 0.03            | 0                 |
| A*68:01       | 0.03               | 0.03            | 0                 |
| B*07:02       | 0.34               | 0.32            | 0                 |
| B*08:01       | 0.08               | 0.06            | 1                 |
| B*13:02       | 0.02               | 0.01            | 0                 |
| B*14:01       | 0.00               | 0.00            | 0                 |
| B*14:02       | 0.01               | 0.01            | 0                 |
| B*15:01       | 0.05               | 0.04            | 1                 |
| B*18:01       | 0.05               | 0.06            | 1                 |
| B*27:05       | 0.02               | 0.02            | 0                 |
| B*35:01       | 0.05               | 0.06            | 0                 |
| B*35:03       | 0.01               | 0.02            | 0                 |
| B*39:01       | 0.01               | 0.02            | 0                 |
| B*40:01       | 0.05               | 0.04            | 1                 |
| B*44:02       | 0.06               | 0.06            | 1                 |
| B*44:03       | 0.03               | 0.03            | 0                 |
| B*50:01       | 0.01               | 0.01            | 0                 |
| B*51:01       | 0.05               | 0.06            | 1                 |
| B*55:01       | 0.02               | 0.02            | 0                 |
| B*56:01       | 0.01               | 0.01            | 0                 |
| C*01:02       | 0.02               | 0.03            | 0                 |
| C*02:02       | 0.04               | 0.04            | 0                 |
| C*03:03       | 0.04               | 0.04            | 1                 |
| C*03:04       | 0.07               | 0.06            | 1                 |
| C*04:01       | 0.08               | 0.10            | 0                 |
| C*05:01       | 0.06               | 0.06            | 1                 |
| C*06:02       | 0.07               | 0.06            | 0                 |
| C*07:01       | 0.12               | 0.10            | 0                 |
| C*07:02       | 0.35               | 0.33            | 0                 |
| C*07:04       | 0.01               | 0.01            | 0                 |
| C*08:02       | 0.01               | 0.02            | 0                 |
| C*12:03       | 0.05               | 0.06            | 1                 |
| C*14:02       | 0.01               | 0.02            | 0                 |
| C*15:02       | 0.02               | 0.03            | 0                 |
| C*16:01       | 0.02               | 0.02            | 1                 |

Frq: frequency, alleles with significant between-country heterogeneity are indicated as 1.

**Table S2. *DQB1*-uncorrected class I associations with narcolepsy.**

| Allele         | OR-NL | OR-FR | OR-DE | OR-CH | OR-PL | OR-MH | CI95-MH      | P-MH            |
|----------------|-------|-------|-------|-------|-------|-------|--------------|-----------------|
| <i>A*11:01</i> | 1.30  | 2.13  | 1.25  | 1.73  | 1.43  | 1.46  | 1.263-1.686  | <b>2.88E-07</b> |
| <i>B*08:01</i> | 0.67  | 0.84  | 0.94  | 0.38  | 1.02  | 0.72  | 0.620-0.836  | <b>1.68E-05</b> |
| <i>A*01:01</i> | 0.79  | 0.74  | 0.84  | 0.63  | 1.45  | 0.79  | 0.704-0.884  | <b>4.46E-05</b> |
| <i>C*04:01</i> | 1.17  | 1.40  | 1.14  | 1.56  | 1.11  | 1.26  | 1.111-1.420  | <b>2.64E-04</b> |
| <i>C*07:01</i> | 0.76  | 0.89  | 0.87  | 0.61  | 1.03  | 0.81  | 0.720-0.916  | <b>7.23E-04</b> |
| <i>B*13:02</i> | 0.46  | 0.53  | 0.74  | 0.63  | 0.65  | 0.60  | 0.439-0.830  | <b>1.91E-03</b> |
| <i>B*35:01</i> | 1.24  | 1.72  | 1.21  | 1.22  | 1.16  | 1.26  | 1.081-1.479  | <b>3.36E-03</b> |
| <i>B*35:03</i> | 1.39  | 0.68  | 1.74  | 2.74  | 4.33  | 1.47  | 1.133-1.897  | <b>3.64E-03</b> |
| <i>A*03:01</i> | 0.98  | 0.81  | 0.85  | 1.04  | 0.70  | 0.89  | 0.810-0.969  | 8.15E-03        |
| <i>C*12:03</i> | 0.95  | 1.20  | 1.48  | 1.62  | 0.47  | 1.22  | 1.046-1.424  | 1.13E-02        |
| <i>B*56:01</i> | 1.25  | 5.33  | 1.68  | 1.43  | 0.56  | 1.69  | 1.122-2.555  | 1.21E-02        |
| <i>B*39:01</i> | 1.92  | 1.22  | 0.67  | 0.95  | 4.25  | 1.44  | 1.063-1.952  | 1.86E-02        |
| <i>A*25:01</i> | 1.13  | 1.27  | 1.59  | 0.48  | 0.73  | 1.28  | 1.041-1.572  | 1.90E-02        |
| <i>B*51:01</i> | 1.09  | 1.13  | 1.00  | 1.92  | 1.12  | 1.19  | 1.021-1.379  | 2.60E-02        |
| <i>B*07:02</i> | 1.02  | 0.85  | 0.95  | 0.91  | 0.73  | 0.92  | 0.849-0.991  | 2.80E-02        |
| <i>A*29:02</i> | 0.71  | 0.68  | 1.16  | 0.30  | 0.70  | 0.74  | 0.561-0.983  | 3.73E-02        |
| <i>C*07:02</i> | 1.05  | 0.85  | 0.96  | 0.86  | 0.73  | 0.92  | 0.856-0.998  | 4.40E-02        |
| <i>B*15:01</i> | 1.06  | 1.24  | 0.32  | 1.24  | 0.83  | 0.84  | 0.700-0.998  | 4.79E-02        |
| <i>C*14:02</i> | 1.23  | 1.02  | 1.68  | 0.71  | 11.43 | 1.35  | 0.989-1.839  | 5.90E-02        |
| <i>C*01:02</i> | 1.01  | 2.04  | 0.96  | 1.04  | 1.77  | 1.24  | 0.973-1.579  | 8.28E-02        |
| <i>B*18:01</i> | 0.75  | 1.58  | 1.16  | 0.72  | 0.69  | 1.15  | 0.979-1.345  | 8.90E-02        |
| <i>C*06:02</i> | 0.77  | 0.93  | 1.06  | 0.73  | 0.83  | 0.88  | 0.758-1.028  | 1.08E-01        |
| <i>C*15:02</i> | 1.20  | 0.90  | 1.38  | 1.91  | 0.69  | 1.18  | 0.945-1.479  | 1.43E-01        |
| <i>A*30:02</i> | 0.78  | 1.65  | 3.36  | 0.86  | 1.40  | 1.32  | 0.869-1.998  | 1.95E-01        |
| <i>A*24:02</i> | 1.26  | 1.02  | 0.80  | 1.13  | 1.30  | 1.08  | 0.956-1.218  | 2.20E-01        |
| <i>B*55:01</i> | 0.97  | 1.52  | 1.34  | 1.23  | 1.40  | 1.20  | 0.895-1.606  | 2.23E-01        |
| <i>B*44:03</i> | 0.92  | 1.37  | 1.64  | 0.69  | 0.46  | 1.15  | 0.918-1.433  | 2.28E-01        |
| <i>A*32:01</i> | 1.30  | 0.94  | 1.35  | 0.97  | 0.56  | 1.14  | 0.923-1.400  | 2.29E-01        |
| <i>C*03:04</i> | 0.91  | 0.84  | 1.10  | 1.06  | 1.42  | 0.92  | 0.792-1.076  | 3.05E-01        |
| <i>B*50:01</i> | 0.38  | 1.65  | 1.26  | 0.95  | 2.80  | 1.28  | 0.782-2.090  | 3.28E-01        |
| <i>B*40:01</i> | 0.74  | 0.59  | 1.54  | 0.95  | 2.52  | 0.91  | 0.755-1.103  | 3.45E-01        |
| <i>C*07:04</i> | 1.54  | 0.60  | 0.97  | 1.07  | 1.40  | 1.15  | 0.820-1.597  | 4.27E-01        |
| <i>C*08:02</i> | 1.40  | 0.85  | 0.94  | 0.78  | 2.83  | 1.13  | 0.822-1.559  | 4.46E-01        |
| <i>A*02:01</i> | 0.95  | 0.93  | 1.07  | 1.01  | 0.82  | 0.97  | 0.894-1.053  | 4.74E-01        |
| <i>B*44:02</i> | 1.33  | 0.62  | 0.62  | 0.92  | 3.46  | 0.95  | 0.807-1.112  | 5.07E-01        |
| <i>A*26:01</i> | 1.17  | 1.13  | 1.14  | 1.23  | 0.55  | 1.09  | 0.833-1.436  | 5.19E-01        |
| <i>A*31:01</i> | 0.95  | 0.70  | 1.00  | 1.50  | 2.12  | 0.94  | 0.718-1.224  | 6.35E-01        |
| <i>A*68:01</i> | 1.08  | 0.92  | 0.60  | 1.96  | 2.87  | 1.05  | 0.828-1.325  | 6.99E-01        |
| <i>B*27:05</i> | 1.05  | 0.87  | 0.75  | 0.95  | 2.27  | 0.97  | 0.715-1.318  | 8.49E-01        |
| <i>C*05:01</i> | 1.21  | 0.85  | 0.72  | 0.82  | 2.38  | 0.98  | 0.814-1.185  | 8.55E-01        |
| <i>C*02:02</i> | 1.12  | 0.87  | 1.07  | 0.73  | 1.41  | 1.02  | 0.805-1.286  | 8.86E-01        |
| <i>C*16:01</i> | 0.78  | 0.78  | 2.54  | 0.43  | 0.70  | 0.98  | 0.658-1.445  | 9.02E-01        |
| <i>B*14:01</i> | 1.29  | 0.32  | 1.25  | 1.43  | 2.80  | 0.99  | 0.553-1.758  | 9.61E-01        |
| <i>B*14:02</i> | 1.34  | 0.78  | 0.83  | 0.45  | 2.81  | 1.01  | 0.719-1.404  | 9.78E-01        |
| <i>C*03:03</i> | 1.07  | 1.34  | 0.51  | 1.57  | 2.24  | 1.00  | 0.087-11.623 | 9.97E-01        |

P values in bold survive Benjamini-Hochberg false discovery rate controlled at 5%. OD: Odds ratio, NL: Netherlands, FR: France, DE: Germany, CH: Switzerland, PL: Poland/ Slovakia. MH: Mantel-Haenszel, CI95: 95% confidence interval.

**Table S3. DQB1-conditional HLA class I associations with narcolepsy.**

| Allele  | X-NL  | P-NL | X-FR  | P-FR | X-DE  | P-DE | X-CH  | P-CH | X-PL  | P-PL | X-all | P-all           |
|---------|-------|------|-------|------|-------|------|-------|------|-------|------|-------|-----------------|
| A*11:01 | 0.24  | 0.19 | 0.73  | 0.00 | 0.24  | 0.35 | 0.74  | 0.07 | 0.64  | 0.15 | 0.35  | <b>6.95E-04</b> |
| C*04:01 | 0.29  | 0.08 | 0.36  | 0.05 | 0.15  | 0.52 | 0.59  | 0.07 | 0.29  | 0.44 | 0.28  | <b>1.65E-03</b> |
| B*08:01 | -0.18 | 0.33 | -0.32 | 0.15 | -0.02 | 0.94 | -1.05 | 0.05 | 0.23  | 0.65 | -0.33 | <b>4.71E-03</b> |
| B*35:01 | 0.38  | 0.03 | 0.52  | 0.04 | 0.21  | 0.46 | 0.29  | 0.51 | 0.53  | 0.33 | 0.30  | 7.56E-03        |
| A*01:01 | -0.12 | 0.36 | -0.31 | 0.07 | -0.13 | 0.44 | -0.43 | 0.12 | 0.54  | 0.15 | -0.21 | 1.02E-02        |
| A*25:01 | 0.02  | 0.95 | 0.47  | 0.14 | 0.53  | 0.05 | -0.69 | 0.21 | -0.21 | 0.60 | 0.37  | 1.15E-02        |
| C*12:03 | -0.07 | 0.78 | 0.30  | 0.15 | 0.39  | 0.09 | 0.57  | 0.16 | -0.68 | 0.08 | 0.27  | 1.36E-02        |
| C*07:01 | -0.16 | 0.30 | -0.27 | 0.12 | -0.14 | 0.47 | -0.45 | 0.13 | 0.03  | 0.95 | -0.21 | 1.95E-02        |
| B*35:03 | 0.25  | 0.53 | -0.30 | 0.37 | 0.54  | 0.20 | 0.96  | 0.06 | 1.56  | 0.02 | 0.39  | 3.16E-02        |
| B*56:01 | 0.29  | 0.60 | 1.79  | 0.01 | 0.60  | 0.40 | 0.38  | 0.76 | -0.23 | 0.83 | 0.57  | 4.53E-02        |
| C*07:02 | 0.03  | 0.76 | -0.06 | 0.63 | -0.04 | 0.74 | -0.20 | 0.37 | -0.45 | 0.08 | -0.11 | 6.50E-02        |
| B*07:02 | 0.00  | 1.00 | -0.06 | 0.63 | -0.05 | 0.73 | -0.12 | 0.60 | -0.42 | 0.10 | -0.12 | 6.57E-02        |
| B*13:02 | -0.42 | 0.27 | -0.53 | 0.29 | -0.23 | 0.55 | -0.37 | 0.55 | -0.13 | 0.83 | -0.36 | 6.87E-02        |
| B*18:01 | -0.32 | 0.16 | 0.53  | 0.01 | 0.16  | 0.47 | -0.38 | 0.35 | -0.37 | 0.25 | 0.20  | 8.68E-02        |
| A*03:01 | 0.00  | 0.96 | -0.11 | 0.44 | -0.19 | 0.19 | 0.02  | 0.92 | -0.33 | 0.21 | -0.10 | 1.07E-01        |
| C*03:04 | -0.22 | 0.14 | -0.16 | 0.57 | 0.02  | 0.93 | 0.04  | 0.92 | 0.21  | 0.67 | -0.16 | 1.09E-01        |
| B*44:03 | 0.11  | 0.72 | 0.24  | 0.36 | 0.60  | 0.16 | -0.32 | 0.56 | -0.59 | 0.40 | 0.26  | 1.13E-01        |
| B*15:01 | 0.06  | 0.73 | 0.18  | 0.57 | -     | -    | 0.32  | 0.50 | -0.24 | 0.72 | -0.18 | 1.31E-01        |
| C*01:02 | 0.06  | 0.86 | 0.75  | 0.05 | -0.05 | 0.89 | 0.03  | 0.96 | 0.96  | 0.14 | 0.27  | 1.39E-01        |
| B*40:01 | -0.46 | 0.03 | -0.46 | 0.16 | 0.35  | 0.20 | -0.11 | 0.84 | 0.99  | 0.12 | -0.18 | 1.64E-01        |
| B*51:01 | 0.01  | 0.97 | 0.08  | 0.69 | 0.00  | 1.00 | 0.62  | 0.03 | -0.19 | 0.71 | 0.14  | 2.12E-01        |
| B*39:01 | 0.60  | 0.09 | 0.21  | 0.68 | -0.46 | 0.37 | 0.01  | 0.99 | 1.13  | 0.25 | 0.29  | 2.16E-01        |
| B*50:01 | -0.52 | 0.48 | 0.46  | 0.36 | 0.32  | 0.67 | -0.03 | 0.98 | 1.89  | 0.29 | 0.41  | 2.29E-01        |
| A*29:02 | -0.29 | 0.37 | -0.41 | 0.15 | 0.19  | 0.72 | -0.78 | 0.22 | -0.33 | 0.76 | -0.22 | 2.34E-01        |
| B*44:02 | 0.23  | 0.19 | -0.52 | 0.05 | -     | .    | -0.05 | 0.90 | 1.24  | 0.04 | -0.12 | 2.53E-01        |
| A*02:01 | -0.12 | 0.20 | -0.07 | 0.56 | 0.05  | 0.69 | 0.02  | 0.93 | -0.31 | 0.21 | -0.06 | 2.85E-01        |
| A*30:02 | -0.18 | 0.71 | 0.34  | 0.49 | 1.45  | 0.09 | -0.30 | 0.76 | 0.35  | 0.75 | 0.31  | 2.91E-01        |
| C*14:02 | 0.05  | 0.91 | 0.05  | 0.90 | 0.53  | 0.29 | -0.31 | 0.65 | 2.44  | 0.05 | 0.24  | 3.03E-01        |
| C*15:02 | 0.13  | 0.65 | -0.18 | 0.55 | 0.35  | 0.36 | 0.95  | 0.07 | -0.65 | 0.36 | 0.16  | 3.30E-01        |
| C*08:02 | 0.40  | 0.37 | -0.14 | 0.71 | -0.05 | 0.91 | -0.25 | 0.72 | 0.87  | 0.29 | 0.21  | 3.42E-01        |
| C*06:02 | -0.21 | 0.23 | -0.10 | 0.65 | 0.12  | 0.61 | -0.29 | 0.43 | -0.08 | 0.84 | -0.08 | 4.26E-01        |
| A*31:01 | -0.07 | 0.79 | -0.41 | 0.23 | 0.02  | 0.96 | 0.43  | 0.46 | 0.66  | 0.45 | -0.12 | 4.51E-01        |
| A*24:02 | 0.21  | 0.16 | -0.05 | 0.79 | -0.20 | 0.28 | 0.18  | 0.52 | 0.24  | 0.52 | 0.05  | 5.47E-01        |
| A*26:01 | 0.17  | 0.61 | 0.25  | 0.53 | 0.08  | 0.83 | 0.19  | 0.74 | -0.49 | 0.41 | 0.11  | 5.49E-01        |
| A*32:01 | 0.25  | 0.32 | -0.14 | 0.64 | 0.33  | 0.34 | 0.05  | 0.92 | -1.02 | 0.28 | 0.09  | 5.56E-01        |
| C*16:01 | -0.06 | 0.85 | -0.38 | 0.17 | -     | -    | -0.64 | 0.39 | -0.14 | 0.90 | 0.11  | 5.80E-01        |
| C*05:01 | 0.17  | 0.35 | -0.21 | 0.36 | -0.30 | 0.21 | -0.25 | 0.55 | 1.00  | 0.16 | -0.06 | 6.06E-01        |
| B*55:01 | -0.21 | 0.49 | 0.61  | 0.19 | 0.27  | 0.57 | 0.14  | 0.86 | 0.19  | 0.81 | 0.09  | 6.55E-01        |
| B*14:02 | 0.35  | 0.49 | -0.20 | 0.64 | -0.19 | 0.71 | -0.59 | 0.46 | 1.22  | 0.30 | 0.10  | 6.81E-01        |
| C*07:04 | 0.39  | 0.26 | -0.50 | 0.33 | -0.09 | 0.84 | 0.15  | 0.89 | 0.21  | 0.83 | 0.06  | 8.00E-01        |
| C*03:03 | 0.03  | 0.89 | 0.34  | 0.27 | -     | -    | 0.55  | 0.27 | 0.96  | 0.12 | -0.03 | 8.02E-01        |
| C*02:02 | 0.05  | 0.80 | -0.15 | 0.55 | 0.10  | 0.72 | -0.33 | 0.46 | 0.08  | 0.89 | -0.02 | 8.74E-01        |
| B*27:05 | 0.01  | 0.96 | -0.18 | 0.58 | -0.24 | 0.53 | 0.02  | 0.97 | 0.91  | 0.24 | -0.02 | 8.86E-01        |
| A*68:01 | 0.10  | 0.67 | -0.09 | 0.78 | -0.48 | 0.24 | 0.92  | 0.07 | 1.26  | 0.07 | 0.00  | 9.95E-01        |
| B*14:01 | 0.55  | 0.47 | -0.95 | 0.22 | 0.34  | 0.79 | 0.16  | 0.89 | 1.16  | 0.48 | 0.00  | 9.99E-01        |

P values in bold survive Benjamini-Hochberg false discovery rate controlled at 5%. X: effect size, NL: Netherlands, FR: France, DE: Germany, CH: Switzerland, PL: Poland/ Slovakia.

**Table S4. *DQB1*-stratified HLA class I associations with narcolepsy.**

| Allele         | X     | P               |
|----------------|-------|-----------------|
| <i>A*11:01</i> | 0.38  | <b>5.58E-04</b> |
| <i>C*04:01</i> | 0.31  | <b>8.61E-04</b> |
| <i>B*35:01</i> | 0.34  | <b>4.59E-03</b> |
| <i>B*08:01</i> | -0.31 | <b>4.67E-03</b> |
| <i>A*01:01</i> | -0.20 | 1.02E-02        |
| <i>C*12:03</i> | 0.29  | 1.05E-02        |
| <i>A*25:01</i> | 0.39  | 1.09E-02        |
| <i>C*07:01</i> | -0.21 | 1.99E-02        |
| <i>B*35:03</i> | 0.44  | 2.42E-02        |
| <i>B*07:02</i> | -0.13 | 3.93E-02        |
| <i>C*07:02</i> | -0.13 | 4.25E-02        |
| <i>B*56:01</i> | 0.65  | 4.62E-02        |
| <i>B*18:01</i> | 0.20  | 8.51E-02        |
| <i>B*13:02</i> | -0.36 | 1.05E-01        |
| <i>C*01:02</i> | 0.28  | 1.13E-01        |
| <i>A*03:01</i> | -0.10 | 1.34E-01        |
| <i>B*44:03</i> | 0.22  | 1.89E-01        |
| <i>B*39:01</i> | 0.30  | 1.92E-01        |
| <i>B*51:01</i> | 0.14  | 1.95E-01        |
| <i>C*03:04</i> | -0.13 | 2.35E-01        |
| <i>A*29:02</i> | -0.22 | 2.37E-01        |
| <i>B*44:02</i> | -0.13 | 2.48E-01        |
| <i>B*15:01</i> | -0.14 | 2.94E-01        |
| <i>A*02:01</i> | -0.06 | 3.02E-01        |
| <i>B*55:01</i> | 0.22  | 3.11E-01        |
| <i>C*14:02</i> | 0.23  | 3.16E-01        |
| <i>C*15:02</i> | 0.16  | 3.35E-01        |
| <i>B*40:01</i> | -0.13 | 3.39E-01        |
| <i>C*08:02</i> | 0.21  | 3.44E-01        |
| <i>B*50:01</i> | 0.32  | 3.52E-01        |
| <i>A*30:02</i> | 0.25  | 3.91E-01        |
| <i>A*32:01</i> | 0.11  | 4.71E-01        |
| <i>A*24:02</i> | 0.06  | 4.93E-01        |
| <i>C*06:02</i> | -0.07 | 5.02E-01        |
| <i>A*31:01</i> | -0.10 | 5.27E-01        |
| <i>A*26:01</i> | 0.11  | 5.57E-01        |
| <i>C*16:01</i> | 0.11  | 5.81E-01        |
| <i>C*05:01</i> | -0.06 | 5.93E-01        |
| <i>B*14:02</i> | 0.10  | 6.94E-01        |
| <i>C*03:03</i> | -0.03 | 7.98E-01        |
| <i>C*07:04</i> | 0.05  | 8.09E-01        |
| <i>C*02:02</i> | -0.02 | 8.72E-01        |
| <i>B*27:05</i> | -0.02 | 9.28E-01        |
| <i>A*68:01</i> | 0.00  | 9.78E-01        |
| <i>B*14:01</i> | 0.00  | 9.96E-01        |

P values in bold survive Benjamini-Hochberg false discovery rate controlled at 5%. X: effect size, NL: Netherlands, FR: France, DE: Germany, CH: Switzerland, PL: Poland/ Slovakia.
